# Supplementary material
Source: PubMed Central journal article supplement (PMC4432031)
Supplement: NIHMS686053-supplement-supplement_1.pdf [file NIHMS686053-supplement-supplement_1.pdf]

**APPENDIX**

Supplemental Table 1. Wireless motility capsule raw data for cohorts of gastroparesis (GP) patients

| Cohort      | Patient # | GP Etiology | Transit Time (hr:min) |       |        | Antral Contractility |       |       |           | Duodenal Contractility |       |       |           |
|-------------|-----------|-------------|-----------------------|-------|--------|----------------------|-------|-------|-----------|------------------------|-------|-------|-----------|
|             |           |             | GET                   | SBTT  | CTT    | Ct                   | AUC   | MI    | Data (%)* | Ct                     | AUC   | MI    | Data (%)* |
| Multicenter | 1         | Idiopathic  | 5:25                  | 6:35  | 18:22  | 12                   | 1102  | 8.65  | 100%      | 94                     | 2147  | 12.00 | 100%      |
|             | 2         | Diabetic    | 5:31                  | 6:41  | 88:06  | 69                   | 4150  | 12.03 | 100%      | 69                     | 1623  | 11.20 | 91%       |
|             | 3         | Idiopathic  | 5:35                  | 5:26  | 34:10  | 48                   | 8013  | 11.95 | 100%      | 78                     | 3531  | 12.25 | 100%      |
|             | 4         | Diabetic    | 5:41                  | 4:34  | 60:43  | 80                   | 2226  | 11.68 | 100%      | 439                    | 15631 | 15.08 | 96%       |
|             | 5         | Idiopathic  | 9:14                  | 7:40  | 111:47 | 122                  | 2794  | 12.47 | 96%       | 172                    | 5233  | 13.19 | 98%       |
|             | 6         | Idiopathic  | 10:13                 | 1:50  | 9:11   | 41                   | 1024  | 10.39 | 99%       | 94                     | 1510  | 11.86 | 90%       |
|             | 7         | Idiopathic  | 11:43                 | 2:26  | 39:38  | 43                   | 2562  | 11.02 | 98%       | 311                    | 19781 | 14.72 | 100%      |
|             | 8         | Idiopathic  | 14:16                 | 3:48  | 11:55  | 20                   | 3989  | 10.45 | 100%      | 63                     | 8287  | 12.16 | 98%       |
|             | 9         | Idiopathic  | 17:29                 | 6:08  | 23:25  |                      |       |       | 65%       | 135                    | 3383  | 12.54 | 94%       |
|             | 10        | Idiopathic  | 20:21                 | 2:54  | 47:14  | 52                   | 3675  | 11.09 | 88%       | 171                    | 5927  | 13.23 | 93%       |
|             | 11        | Idiopathic  | 20:26                 | 4:24  | 10:27  | 17                   | 4079  | 9.94  | 100%      | 26                     | 2525  | 10.08 | 100%      |
|             | 12        | Idiopathic  | 20:29                 | 4:44  | 24:20  |                      |       |       | 50%       | 48                     | 1615  | 10.65 | 88%       |
|             | 13        | Diabetic    | 21:37                 | 3:11  | 6:14   | 18                   | 8792  | 10.64 | 100%      | 54                     | 1463  | 10.93 | 100%      |
|             | 14        | Idiopathic  | 21:57                 | 6:47  | 49:15  | 4                    | 1148  | 7.25  | 96%       | 28                     | 735   | 9.34  | 97%       |
|             | 15        | Diabetic    | 22:43                 | 3:29  | 35:40  | 23                   | 6935  | 10.84 | 100%      | 84                     | 3557  | 12.01 | 93%       |
|             | 16        | Idiopathic  | 24:06                 | 3:10  | 27:08  | 26                   | 1851  | 9.56  | 83%       | 53                     | 14631 | 11.46 | 100%      |
|             | 17        | Diabetic    | 24:18                 | 1:52  | 52:04  | 68                   | 10770 | 12.32 | 98%       | 102                    | 6799  | 12.55 | 100%      |
|             | 18        | Diabetic    | 41:44                 | 5:18  | 121:08 | 10                   | 668   | 7.92  | 88%       | 172                    | 6995  | 13.18 | 97%       |
|             | 19        | Diabetic    | 44:50                 | 8:15  | 50:40  |                      |       |       | 50%       | 65                     | 2453  | 11.09 | 93%       |
|             | 20        | Diabetic    | 173:13                | 6:53  | 10:51  | 17                   | 1277  | 8.49  | 96%       |                        |       |       | 65%       |
|             | 21        | Diabetic    | 175:11                | 4:18  | 72:12  | 20                   | 515   | 8.72  | 100%      | 60                     | 5258  | 11.52 | 100%      |
| Clinical    | 22        | Idiopathic  | 4:57                  | 2:20  | 70:05  | 46                   | 4554  | 11.25 | 88%       |                        |       |       | 43%       |
|             | 23        | Diabetic    | 5:07                  | 11:17 | 12:42  | 296                  | 7683  | 14.21 | 100%      | 377                    | 11494 | 14.73 | 98%       |
|             | 24        | Diabetic    | 5:13                  | 4:55  | 60:10  | 116                  | 7650  | 12.99 | 97%       | 237                    | 10554 | 13.97 | 97%       |
|             | 25        | Diabetic    | 5:31                  | 5:04  | 16:50  | 98                   | 5344  | 12.71 | 79%       | 142                    | 4726  | 13.19 | 95%       |
|             | 26        | Idiopathic  | 5:42                  | 3:41  | 15:04  | 164                  | 7340  | 13.18 | 87%       | 75                     | 2147  | 11.37 | 87%       |
|             | 27        | Idiopathic  | 5:44                  | 6:26  | 61:41  | 172                  | 9878  | 13.62 | 98%       | 262                    | 6861  | 13.9  | 88%       |
|             | 28        | Idiopathic  | 5:52                  | 6:41  | 10:11  | 58                   | 3418  | 11.43 | 82%       | 434                    | 12157 | 15.03 | 82%       |
|             | 29        | Diabetic    | 5:59                  | 16:24 | 73:20  | 131                  | 6098  | 12.8  | 100%      | 221                    | 10423 | 13.82 | 97%       |
|             | 30        | Idiopathic  | 6:08                  | 6:24  | 104:58 | 179                  | 30681 | 14.27 | 100%      | 400                    | 12593 | 14.8  | 94%       |
|             | 31        | Idiopathic  | 7:09                  | 5:35  | 32:40  | 127                  | 9255  | 13.09 | 95%       |                        |       |       | 21%       |
|             | 32        | Idiopathic  | 9:02                  | 2:22  | 58:33  | 114                  | 2560  | 12.28 | 97%       | 454                    | 13517 | 15.06 | 97%       |
|             | 33        | Idiopathic  | 10:59                 | 6:57  | 76:29  |                      |       |       | 55%       | 21                     | 935   | 9.18  | 77%       |
|             | 34        | Idiopathic  | 14:13                 | 9:05  | 24:06  | 41                   | 8548  | 11.59 | 91%       |                        |       |       | 46%       |
|             | 35        | Idiopathic  | 20:20                 | 4:17  | 13:36  |                      |       |       | 25%       | 328                    | 14563 | 14.57 | 80%       |
|             | 36        | Idiopathic  | 20:27                 | 7:56  | 76:40  |                      |       |       | 39%       | 207                    | 10284 | 13.7  | 93%       |
|             | 37        | Idiopathic  | 21:11                 | 3:42  | 91:59  | 16                   | 2892  | 9.81  | 99%       | 35                     | 1224  | 10.11 | 94%       |
|             | 38        | Idiopathic  | 21:42                 | 9:45  | 85:24  | 56                   | 11016 | 11.91 | 82%       | 38                     | 5573  | 10.81 | 85%       |
|             | 39        | Idiopathic  | 43:19                 | 8:26  | 33:18  |                      |       |       | 18%       | 327                    | 13430 | 14.33 | 90%       |

\*Only data >70% availability was considered for analysis

Supplemental Table 2. Pearson correlation of symptom severity with small bowel transit time in combined and independent cohorts

| Cohort                   | R    | P*   |
|--------------------------|------|------|
| Combined (n=35)          | 0.39 | 0.02 |
| Clinical Practice (n=15) | 0.35 | 0.2  |
| Multicenter Trial (n=20) | 0.06 | 0.8  |

\*Subject to Bonferroni Correction with an adjusted level of significance of <0.0125
